# Supplementary material
Source: PubMed Central journal article supplement (PMC7395226)
Supplement: NIHMS1607750-supplement-Supplementary_Fig_1.pdf [file NIHMS1607750-supplement-Supplementary_Fig_1.pdf]

Supplementary figure 1

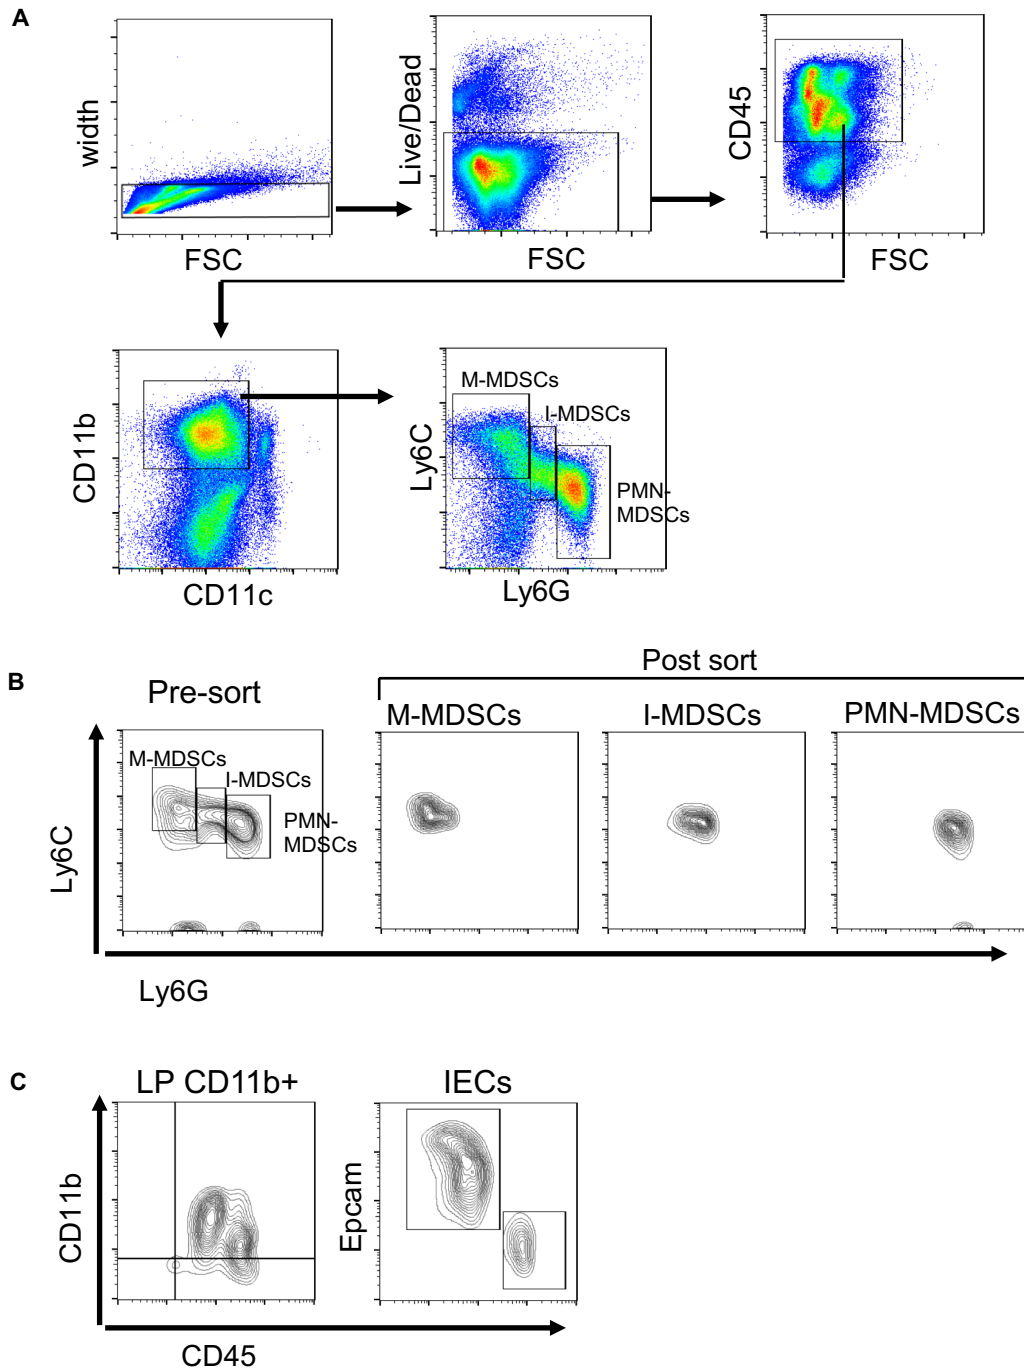

**Supplementary figure 1. Gating strategy for  $Apc^{Min/+}$  splenic MDSCs and purity of sorted cells. (A).** Single live  $CD45^+ CD11b^{hi} CD11c^{lo}$  splenocytes from  $Apc^{Min/+}$  mice were gated into M-MDSCs ( $CD11b^+ Ly6G^- Ly6C^+$ ), I-MDSCs ( $CD11b^+ Ly6C^{int} Ly6G^{int}$ ), and PMN-MDSCs ( $CD11b^+ Ly6G^+ Ly6C^0$ ). **(B)**, Purity of MDSC subsets sorted from live  $Apc^{Min/+}$  splenocytes. **(C)**, Purity of sorted  $CD11b^+$  cells from LP lymphocytes and IECs isolated from small intestine of a WT mouse.
