# Supplementary material
Source: PubMed Central journal article supplement (PMC7395226)
Supplement: NIHMS1607750-supplement-Supplementary_Fig_2.pdf [file NIHMS1607750-supplement-Supplementary_Fig_2.pdf]

## Supplementary figure 2

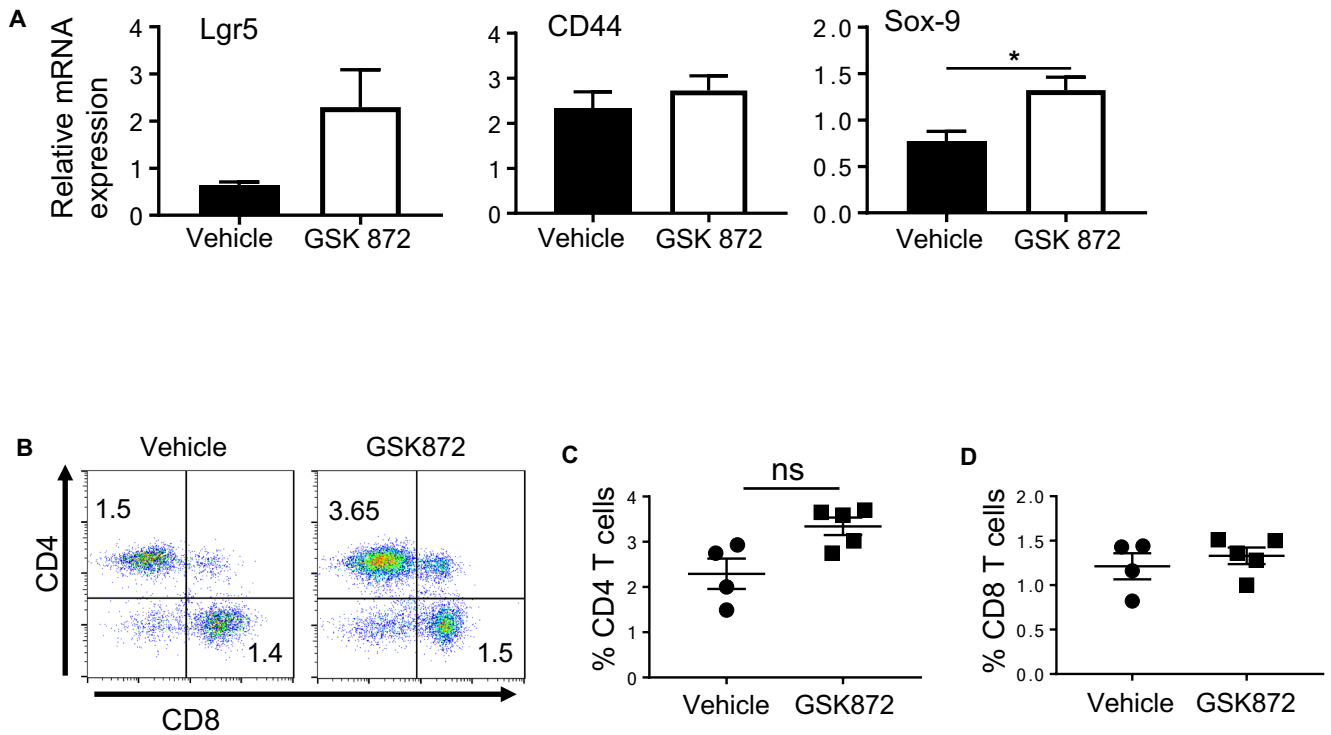

**Supplementary figure 2. Ripk3 inhibition in  $Apc^{Min/+}$  mice alters intestinal stem cell markers and T cells.** (A). Expression of Lgr5, CD44, and Sox-9 in polyps from small intestine of  $Apc^{Min/+}$  mice treated with vehicle or GSK 872 (n=10). Representative flow cytometry plots (B) and frequencies (C) of CD4 and CD8 T cells from the spleens of  $Apc^{Min/+}$  mice treated as in (A), \*  $p < 0.05$ . ns, not significant.
