# Supplementary material
Source: PubMed Central journal article supplement (PMC7395226)
Supplement: NIHMS1607750-supplement-Supplementary_Fig_3.pdf [file NIHMS1607750-supplement-Supplementary_Fig_3.pdf]

Supplementary figure 3

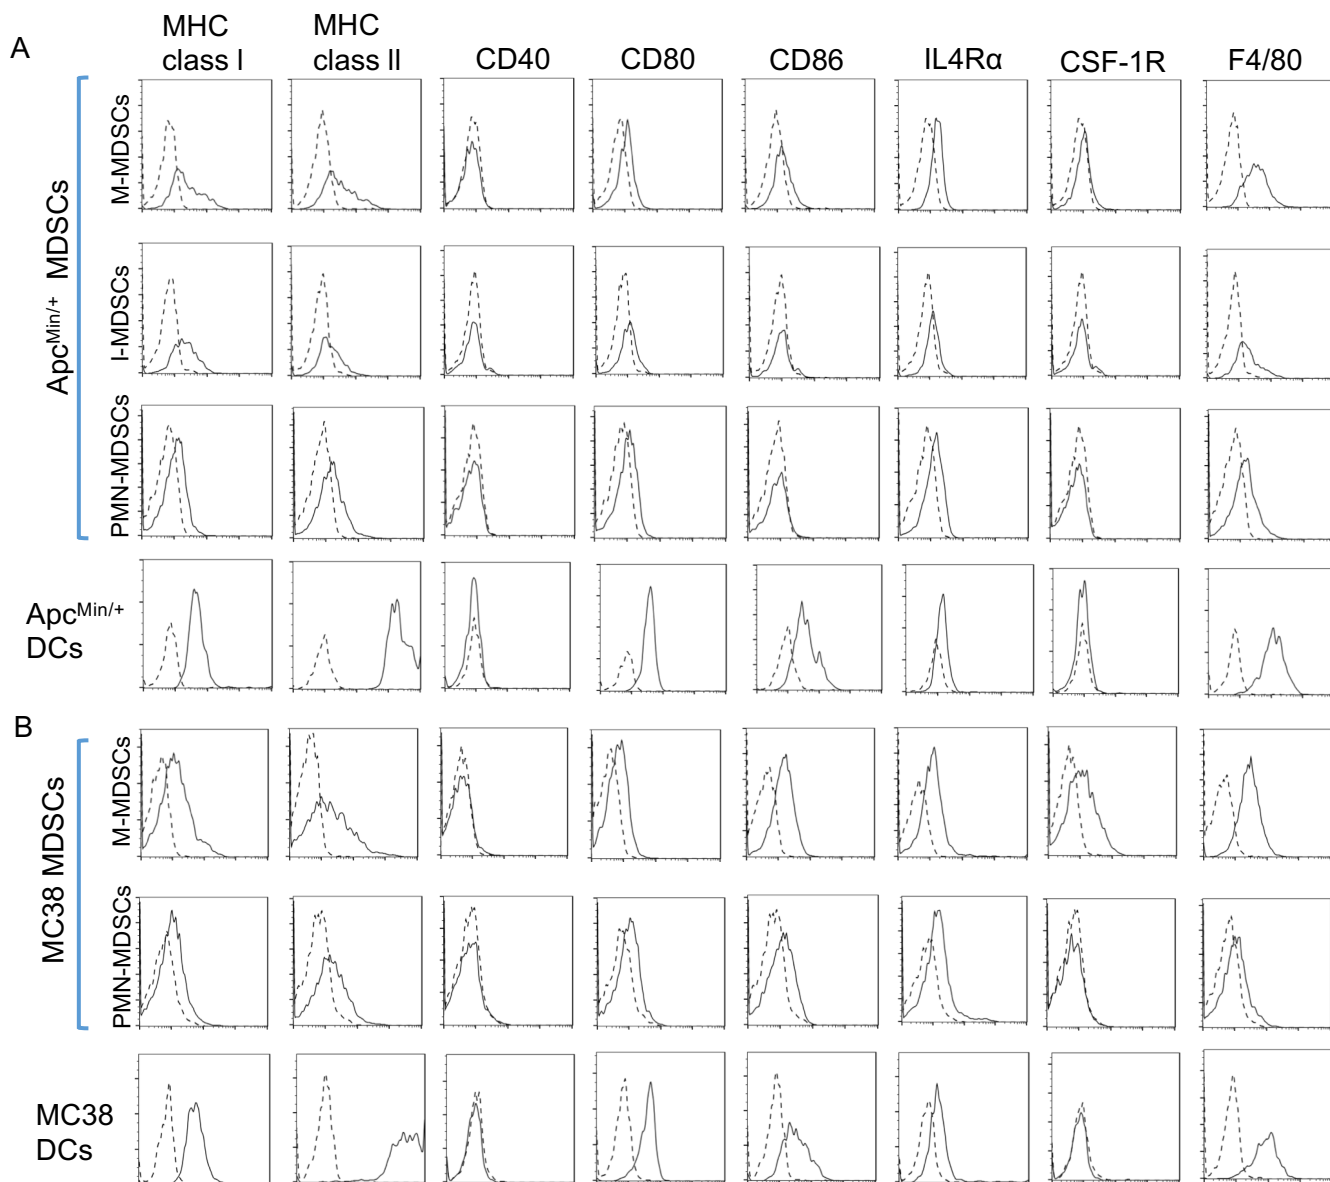

**Supplementary figure 3. Surface marker analysis of Apc<sup>Min/+</sup> MDSCs and MC38 MDSCs.** Representative flow cytometry plots of MDSC subsets from Apc<sup>Min/+</sup> mice (**A**) and from MC38 tumor bearing mice showing expression of antigen presenting molecules including MHC class I and II; costimulatory molecules CD80, CD86, and CD40; IL-4R $\alpha$ ; and macrophage markers CSF-1R and F4/80. Similarly, DCs from Apc<sup>Min/+</sup> and MC38 tumor bearing mice were analyzed. Dotted lines indicate isotype controls.
