# Supplementary material
Source: PubMed Central journal article supplement (PMC7395226)
Supplement: NIHMS1607750-supplement-Supplementary_Fig_4.pdf [file NIHMS1607750-supplement-Supplementary_Fig_4.pdf]

**A**

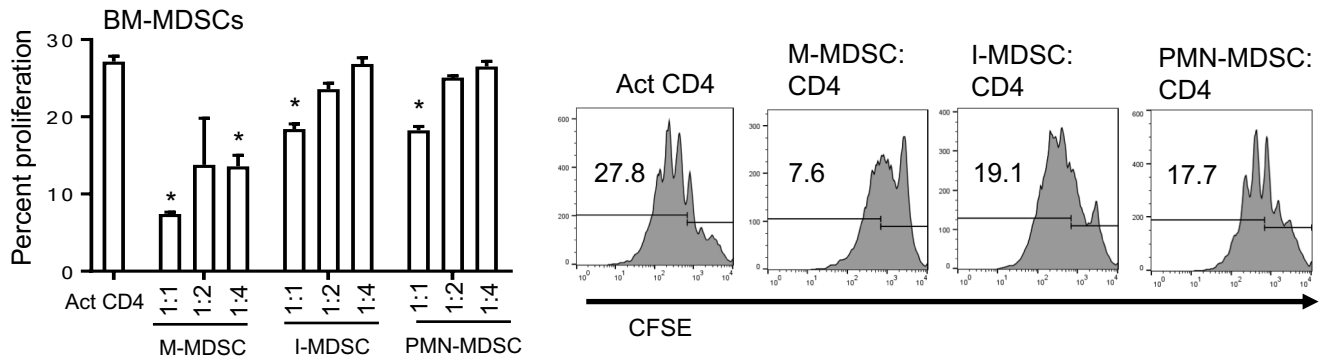

**B**

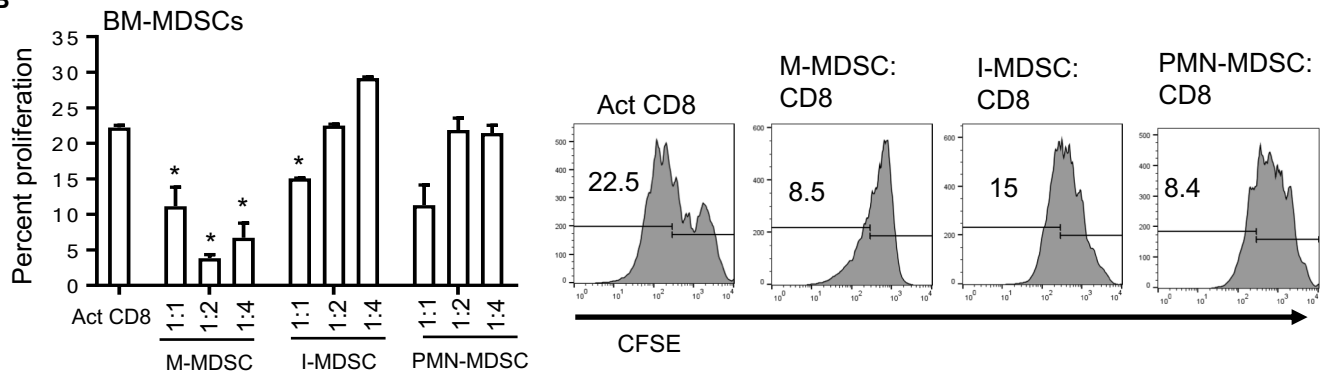

**C**

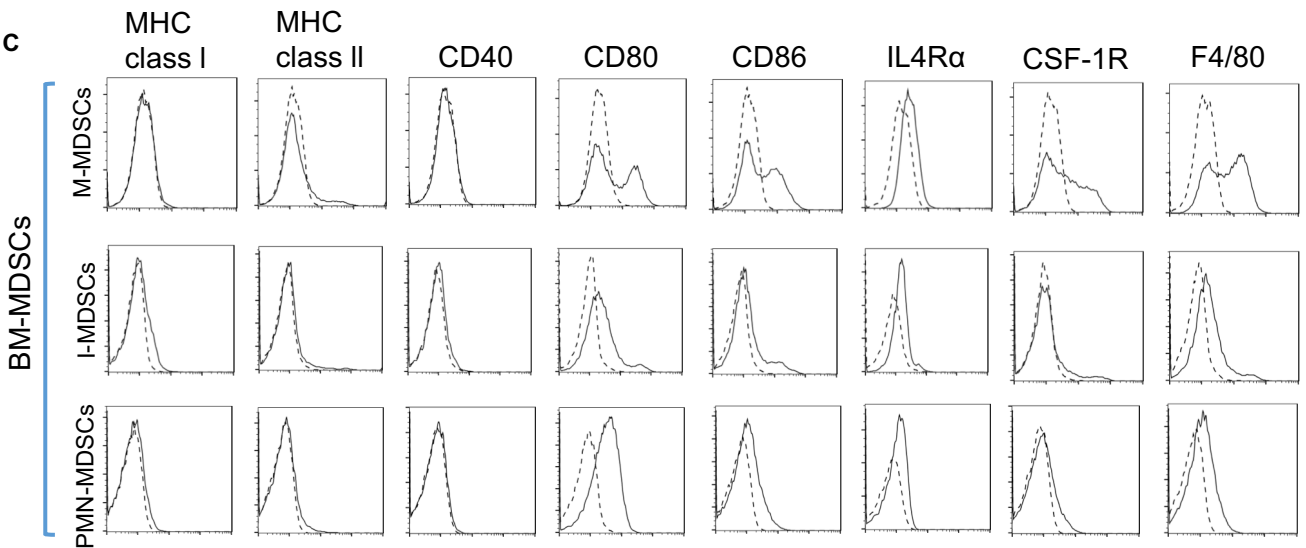

**Supplementary figure 4. Suppressive function and surface marker analysis of BM-MDSCs.** Suppression of CFSE labeled polyclonally activated (anti CD3 and anti CD28) WT CD4 and CD8 T cell proliferation by in vitro generated BM-MDSC subsets (**A, B**). M-MDSCs, I-MDSCs, and PMN-MDSCs were cultured at different MDSC to T cell ratios for 3 days before quantification of proliferation by flow cytometry (n=4). Representative flow cytometry plots for suppression of CD4 and CD8 at 1:1 ratio of MDSCs to T cells are shown. Activated CD4 and CD8 T cells without MDSC co-culture were used as positive controls. Comparisons were made between positive control and each MDSC to T cell co-culture. **C**. Representative flow cytometry plots of vitro generated BM-MDSCs subsets showing expression of antigen presenting molecules including MHC class I and II; costimulatory molecules CD80, CD86, and CD40; IL-4Rα; and macrophage markers CSF-1R and F4/80. Dotted lines indicate isotype controls. \* p<0.05.
