# Supplementary material
Source: PubMed Central journal article supplement (PMC7395226)
Supplement: NIHMS1607750-supplement-Supplementary_Fig_5.pdf [file NIHMS1607750-supplement-Supplementary_Fig_5.pdf]

Supplementary figure 5

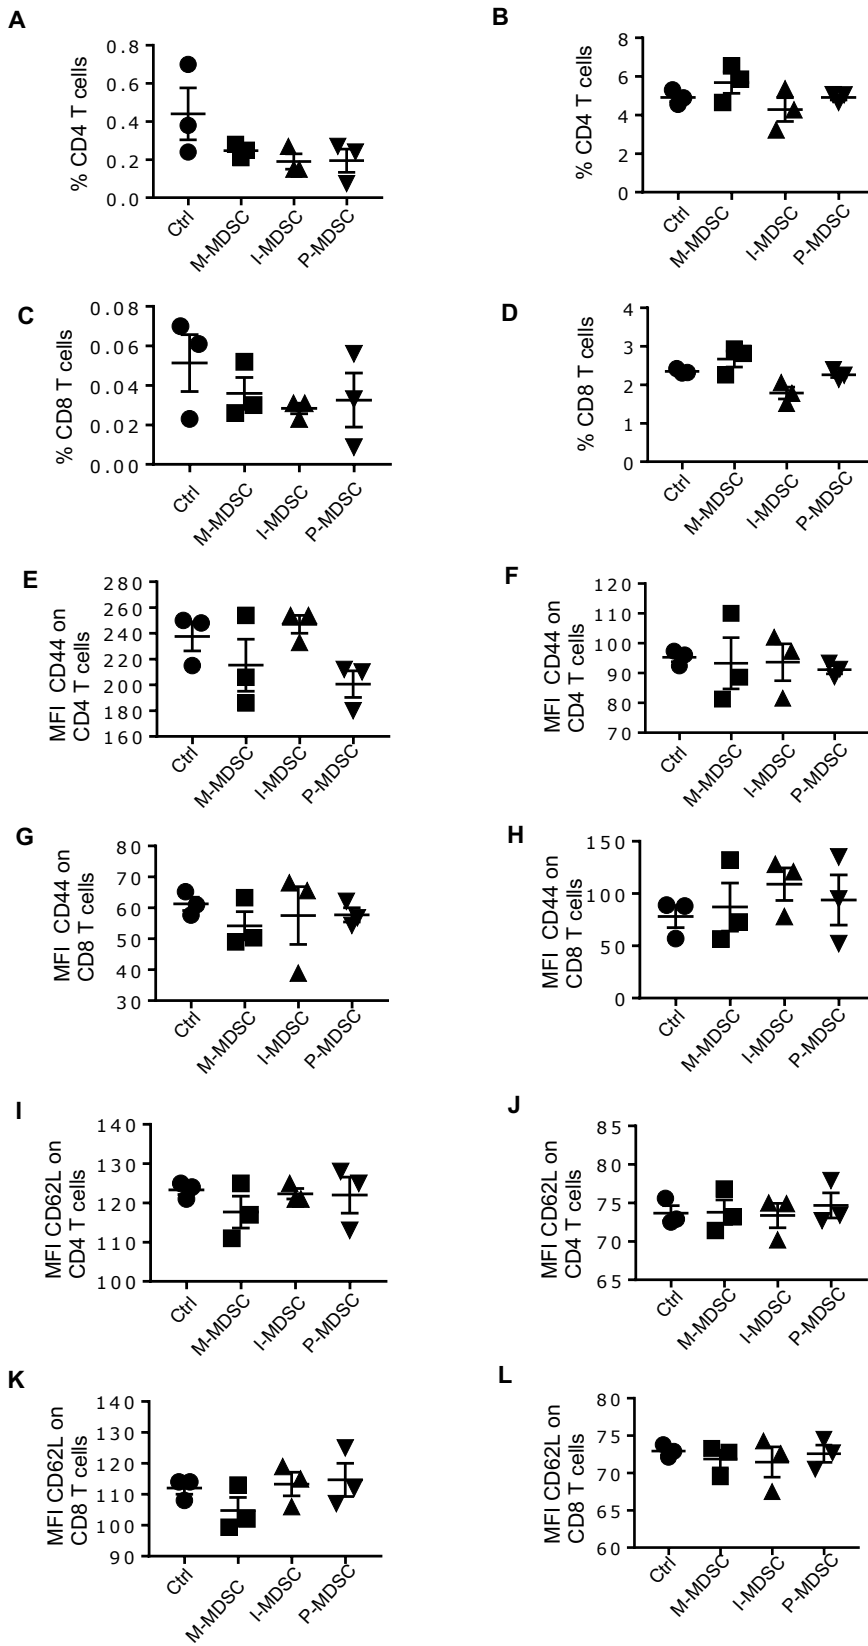

**Supplementary figure 5. T cells in the tumor and spleen of MDSC treated MC38 tumor bearing mice.** Percent of CD4 (A, B) and CD8 (C, D) T cells, expression of CD44 on CD4 (E, F) and CD8 (G, H) T cells and CD62L on CD4 (I, J) and CD8 (K, L) in TILs and spleen of MC38 tumors injected with M-MDSCs, I-MDSCs, or PMN-MDSCs or control MC38 tumors. n=3.
