# Supplementary material
Source: PubMed Central journal article supplement (PMC7395226)
Supplement: NIHMS1607750-supplement-Supplementary_Fig_6.pdf [file NIHMS1607750-supplement-Supplementary_Fig_6.pdf]

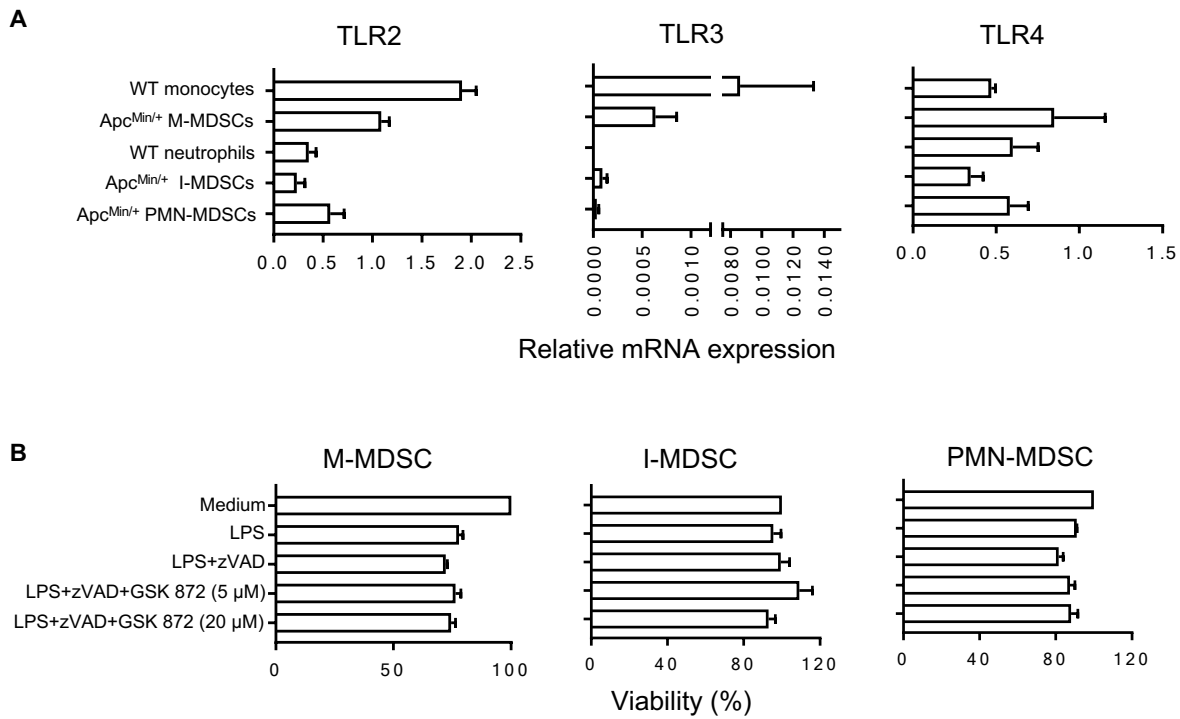

**Supplementary figure 6. TLR expression on Apc<sup>Min/+</sup> MDSCs and viability of activated BM-MDSCs. (A)** mRNA expression of TLR2, TLR3, TLR4 in Apc<sup>Min/+</sup> M-MDSCs, I-MDSCs, and PMN-MDSCs and WT monocytes and neutrophils. (n=8). **(B)** Viability by ATP production in BM-MDSC subsets treated with LPS (10 ng/ml) with or without zVAD (50  $\mu$ M), or LPS plus zVAD and GSK872 for 2 hours. (n=3 to 4).
